# Supplementary material for: The effect of different early weaning regimes on skeletal ontogeny in Ballan wrasse (Labrus bergylta) larvae
Source: Research Square preprint supplement (doi:10.21203/rs.3.rs-8286374/v1), 2025-12-18
Supplement: Supplementary file 1 [file e564cd036bec535b48fd927e.docx]

*Table S1* Content of elements (mg/kg DW)in the different feeds used for the 60-day long start-feeding experiment on ballan wrasse (*Labrys bergylta*): copepod nauplii (*Acartia tonsa*), rotifers (*Brachionus* sp.), barnacle nauplii (*Semibalanus balanoides*; Cryo-L) and dry feed (WINWrasse 150 µm and 300 µm; SPAROS).

| Elements (mg/kg dw) | Copepods (n=1) | | Rotifers (n=2) | | Barnacles (n=2) | | Dry feed (n=2) | |
| --- | --- | --- | --- | --- | --- | --- | --- | --- |
| Average | SD | Average | SD | Average | SD | Average | SD |
| Macro-minerals | | | | | | | | |
| Magnesium | 11 000 |  | 2 300 | 1131 | 13 500 | 2121 | 2 250 | 71 |
| Phosphorus | 11 000 |  | 10 050 | 1344 | 10 500 | 707 | 18 500 | 707 |
| Sulfur | 13 000 |  | 5 750 | 1485 | 15 000 | 1414 | 8 550 | 212 |
| Potassium | 9 900 |  | 6 900 | 3253 | 12 000 | 0 | 7 700 | 141 |
| Calcium | 5 400 |  | 2 200 | 566 | 23 500 | 9192 | 16 500 | 707 |
| Micro-minerals | | | | | | | | |
| Iron | 210.0 |  | 110.0 | 0.0 | 195.0 | 21.2 | 140.0 | 0.0 |
| Zinc | 74.0 |  | 71.0 | 2.8 | 635.0 | 35.4 | 205.0 | 7.1 |
| Chromium | 16.0 |  | 1.1 | 0.5 | 0.4 | - | 1.3 | 0.4 |
| Manganese | 5.3 |  | 6.2 | 0.4 | 4.8 | 0.7 | 90.5 | 6.4 |
| Copper | 22.0 |  | 10.6 | 2.1 | 7.9 | 0.8 | 29.5 | 0.7 |
| Arsenic | 0.64 |  | <0.37 |  | 24.50 | 0.71 | >30 | >30 |
| Cobalt | 0.14 |  | 0.19 | 0.01 | 0.12 | 0.01 | 0.53 | 0.03 |
| Nickel | 3.60 |  | <0.080 |  | 2.10 | 0.42 | <0.080 |  |
| Molybdenum | 0.62 |  | 0.47 | 0.07 | 0.53 | 0.01 | 0.20 | 0.02 |
| Silver | <0.085 |  | <0.085 |  | <0.085 |  | 0.39 | 0.01 |
| Cadmium | 0.00 |  | 0.08 | 0.00 | 0.36 | 0.00 | 0.73 | 0.01 |
| Lead | 0.50 |  | 0.11 | 0.00 | 0.25 | 0.16 | 0.10 | 0.00 |
| Tin | <3.8 |  | <3.8 |  | <3.8 |  | <3.8 |  |
| Mercury | <0.12 |  | <0.12 |  | <0.12 |  | 0.12 |  |
| Ash (%) | 27 |  | 10 | 5 | 29 | 10 | 11 | - |

Table S2: Content of amino acids (% of DW) in the different feeds used for the 56-day long start-feeding experiment on ballan wrasse (*Labrus bergylta*): copepod nauplii (*Acartia tonsa*), rotifers (*Brachionus sp.*), barnacle nauplii (*Semibalanus balanoides*; Cryo-L) and dry feed (WINWrasse 150 µm and 300 µm; SPAROS).

| Amino acid (% of AA) | Copepods (n=1) | | Rotifers (n=2) | | Barnacles (n=4) | | Dry feed (n=2) | |
| --- | --- | --- | --- | --- | --- | --- | --- | --- |
| Average | SD | Average | SD | Average | SD | Average | SD |
| Essential amino acids |  |  |  |  |  |  |  |  |
| Threonine | 4.5 |  | 2.2 | 0.15 | 2.0 | 0.27 | 2.2 | 0.15 |
| Valine | 5.7 |  | 2.8 | 0.23 | 2.4 | 0.38 | 2.8 | 0.08 |
| Methionine | 2.0 |  | 0.9 | 0.05 | 0.9 | 0.07 | 1.4 | 0.00 |
| Isoleucine | 5.2 |  | 2.8 | 0.25 | 1.7 | 0.23 | 2.5 | 0.10 |
| Leucine | 8.2 |  | 4.4 | 0.42 | 3.3 | 0.45 | 4.5 | 0.10 |
| Phenylalanine | 4.5 |  | 2.7 | 0.16 | 2.1 | 0.26 | 2.3 | 0.03 |
| Histidine | 1.6 |  | 0.7 | 0.02 | 0.7 | 0.08 | 0.8 | 0.02 |
| Lysine | 8.9 |  | 4.1 | 0.25 | 2.9 | 0.42 | 4.5 | 0.06 |
| Tryptophan | n.d. |  | n.d. |  | n.d. |  | n.d. |  |
| Other amino acids |  |  |  |  |  |  |  |  |
| Taurin | 0.2 |  | n.d. |  | 0.3 | 0.08 | 0.2 | 0.01 |
| Methionine sulfoxide | n.d. |  | 0.0 |  | 0.1 |  | n.d. |  |
| Hydroxyproline | 0.1 |  | 0.1 | 0.02 | 0.1 | 0.06 | 0.1 | 0.02 |
| Aspartic acid + Asparagine | 7.5 |  | 4.2 | 0.26 | 3.0 | 0.34 | 3.8 | 0.11 |
| Serine | 5.9 |  | 3.0 | 0.33 | 2.5 | 0.35 | 2.8 | 0.14 |
| Glutamic acid + Glutamine | 13.5 |  | 6.5 | 0.46 | 5.1 | 0.69 | 7.6 | 0.05 |
| Proline | 8.3 |  | 2.4 | 0.35 | 3.2 | 0.43 | 2.5 | 0.05 |
| Glycine | 5.3 |  | 1.9 | 0.18 | 2.7 | 0.34 | 3.8 | 0.05 |
| Alanine | 6.9 |  | 2.5 | 0.21 | 3.0 | 0.43 | 4.3 | 0.11 |
| Cystine (Cys-Cys) | 1.5 |  | 0.4 | 0.07 | 0.7 | 0.10 | 1.0 | 0.05 |
| Tyrosine | 3.6 |  | 2.0 | 0.01 | 1.8 | 0.24 | 1.7 | 0.04 |
| Hydroxylysine | n.d. |  | 0.1 |  | 0.0 |  | 0.2 | 0.11 |
| Ammonia | 2.4 |  | 1.1 | 0.06 | 0.8 | 0.08 | 0.8 | 0.00 |
| Arginine | 6.8 |  | 3.0 | 0.15 | 3.3 | 0.36 | 4.0 | 0.07 |
| Total EAA | 40.4 |  | 20.6 | 1.54 | 16.1 | 2.12 | 21.0 | 0.25 |
| Total AA, % of dw | 45.4 |  | 46.8 | 3.59 | 41.7 | 5.26 | 53.0 | 0.24 |
| Protein, % of dw | 50.5 |  | 52.0 | 3.98 | 46.4 | 5.84 | 58.9 | 0.27 |

Table S3: Relative fatty acid composition based on weights (%) of freeze-dried samples of live feeds and dry feed used in a 56 -day long start-feeding experiment on ballan wrasse (*Labrus bergylta*). The fatty acids presented are the ones above 1% of total fatty acids, and in total this accounts for 99% of total fatty acids.

| Fatty acids (% of TFA) | Copepods (n=1) | | Rotifers (n=2) | | Barnacles (n=2) | | Dry feed (n=1) | |
| --- | --- | --- | --- | --- | --- | --- | --- | --- |
| Average | SD | Average | SD | Average | SD | Average | SD |
| C14:0 | 4.5 % | - | 3.1 % | 0.3 % | 2.0 % | 0.2 % | 8.4 % | - |
| C16:0 | 18.1 % | - | 22.4 % | 0.4 % | 24.2 % | 0.3 % | 27.1 % | - |
| C17:0 | 1.8 % | - | 0.0 % | 0.0 % | 0.4 % | 0.6 % | 1.4 % | - |
| C18:0 | 4.1 % | - | 4.2 % | 0.6 % | 4.1 % | 0.3 % | 2.7 % | - |
| C16:1 n7 | 0.7 % | - | 10.1 % | 1.0 % | 5.1 % | 0.4 % | 12.7 % | - |
| C18:1 n9 | 2.5 % | - | 11.9 % | 0.5 % | 7.9 % | 0.0 % | 15.5 % | - |
| C18:1 n7 | 0.0 % | - | 3.0 % | 0.1 % | 8.9 % | 0.1 % | 5.2 % | - |
| C20:1 n9 | 0.0 % | - | 1.0 % | 0.1 % | 2.1 % | 0.1 % | 1.6 % | - |
| C16:4 n3 | 0.0 % | - | 0.0 % | 0.0 % | 0.0 % | 0.0 % | 0.8 % | - |
| C18:2 n6c | 13.1 % | - | 2.0 % | 0.3 % | 1.5 % | 0.1 % | 8.1 % | - |
| C18:2 n6t | 0.0 % | - | 4.9 % | 0.5 % | 0.0 % | 0.0 % | 0.0 % | - |
| C18:3 n6 | 1.4 % | - | 0.5 % | 0.0 % | 0.0 % | 0.0 % | 0.1 % | - |
| C18:3 n3 | 18.9 % | - | 0.6 % | 0.0 % | 1.0 % | 0.1 % | 1.0 % | - |
| C18:4 n3 | 7.7 % | - | 0.7 % | 0.1 % | 1.9 % | 0.2 % | 1.2 % | - |
| C20:2 n6 | 2.7 % | - | 0.1 % | 0.0 % | 0.5 % | 0.0 % | 0.2 % | - |
| C20:3 n6 | 0.0 % | - | 0.6 % | 0.0 % | 0.0 % | 0.0 % | 0.0 % | - |
| C20:4 n6 | 2.1 % | - | 3.0 % | 0.0 % | 1.4 % | 0.0 % | 0.9 % | - |
| C20:5 n3 | 11.1 % | - | 6.6 % | 0.0 % | 24.8 % | 0.0 % | 6.5 % | - |
| C22:4 n6 | 0.7 % | - | 0.0 % | 0.0 % | 0.3 % | 0.0 % | 0.1 % | - |
| C22:5 n3 | 0.5 % | - | 1.3 % | 0.2 % | 0.2 % | 0.0 % | 0.3 % | - |
| C22:6 n3 | 10.1 % | - | 23.3 % | 2.2 % | 13.6 % | 0.8 % | 5.4 % | - |
|  | | | | | | | | |
| Sum sat | 28 % |  | 30 % | 1.3 % | 31 % | 1.4 % | 40 % |  |
| Sum mono | 3 % |  | 26 % | 2.0 % | 24 % | 1.6 % | 35 % |  |
| Sum poly | 68 % |  | 44 % | 2.1 % | 45 % | 1.4 % | 24 % |  |
| Sum n3 | 48 % |  | 33 % | 2.2 % | 42 % | 0.9 % | 15 % |  |
| Sum n6 | 20 % |  | 11 % | 1.8 % | 4 % | 0.7 % | 9 % |  |
| n3/n6 | 2.4 |  | 2.9 |  | 11.1 |  | 1.6 |  |
| DHA/EPA | 0.9 |  | 3.5 |  | 0.6 |  | 0.8 |  |
| EPA/ARA | 5.3 |  | 2.2 |  | 17.3 |  | 7.1 |  |
| Total fatty acids (% of dw) | 30,2 % | - | 50,1 % | 1,4 % | 15,6 % | 0,4 % | 56,6 % | - |

Table S4: Relative lipid class composition based on area of freeze-dried samples of live feeds and dry feed used in a 56-day long start-feeding experiment on ballan wrasse (*Labrus bergylta*). Diacylglycerol (DG), Acylcarnitine (CAR), Cholesteryl ester (CE), Ceramide (CER), Cholesterol (CHOL), Hexosylceramide (HEXCER), Lysophosphatidylcholine (LPC), Lysophosphatidylethanolamine (LPE), Phosphatidylcholine (PC), Phosphatidylethanolamine (PE), Sphingomyelin (SM), Triacylglycerol (TG), Fatty acid (FA), Phosphatidylserine (PS), Phosphatidylinositol (PI), Phosphatidylglycerol (PG).

| Lipid class (% of total area) | Copepods (n=1) | | Rotifers (n=2) | | Barnacles (n=2) | | | Dry feed (n=1) | |
| --- | --- | --- | --- | --- | --- | --- | --- | --- | --- |
| Average | SD | Average | SD | Average | SD | Average | | SD |
| DG | 0.4 |  | 0.2 | 0.1 | 0.1 | 0.0 | 0.3 | |  |
| CAR | 0.0 |  | 0.1 | 0.0 | 0.2 | 0.0 | 0.0 | |  |
| CE | 0.1 |  | 0.2 | 0.1 | 0.1 | 0.0 | 0.0 | |  |
| CER | 0.1 |  | 0.1 | 0.0 | 0.2 | 0.1 | 0.0 | |  |
| CHOL | 0.0 |  | 0.0 | 0.0 | 0.0 | 0.0 | 0.0 | |  |
| HEXCER | 0.0 |  | 0.2 | 0.0 | 0.0 | 0.0 | 0.0 | |  |
| LPC | 0.7 |  | 1.6 | 1.7 | 0.3 | 0.1 | 1.2 | |  |
| LPE | 0.2 |  | 0.1 | 0.2 | 0.0 | 0.0 | 0.0 | |  |
| PC | 52.1 |  | 48.8 | 14.0 | 72.0 | 3.6 | 17.3 | |  |
| PE | 2.2 |  | 1.1 | 0.1 | 2.7 | 0.5 | 0.2 | |  |
| SM | 5.3 |  | 0.0 | 0.0 | 5.2 | 0.7 | 0.2 | |  |
| TG | 23.0 |  | 31.9 | 7.1 | 9.5 | 1.3 | 72.2 | |  |
| FA | 14.0 |  | 9.8 | 4.8 | 5.6 | 1.3 | 6.0 | |  |
| PS | 1.2 |  | 0.1 | 0.1 | 0.5 | 0.7 | 1.0 | |  |
| PI | 0.8 |  | 2.8 | 0.2 | 3.0 | 0.3 | 1.5 | |  |
| PG | 0.0 |  | 2.9 | 0.1 | 0.5 | 0.1 | 0.2 | |  |
| Polar lipids | 62.5 |  | 57.5 | 16.4 | 84.3 | 6.2 | 21.5 | |  |

Table S5. Overview of the categories used for differentiating between weaned and not weaned larvae across different timepoints.

| **Diet** | **16 DPH** | **23 DPH** | **31 DPH** |
| --- | --- | --- | --- |
| **Live feed** | P2, P3, P4 | P3, P4 | P4 |
| **Live feed + Dry Feed** | P1 | P1, P2 | P1, P2, P3 |
